# Supplementary material for: Transcriptional and post-translational changes in the brain of mice deficient in cholesterol removal mediated by cytochrome P450 46A1 (CYP46A1)
Source: PubMed Central journal article supplement (PMC5658173; doi:10.1371/journal.pone.0187168), 2017-10-26
Supplement: pone.0187168.s002.pdf [file pone.0187168.s002.pdf]

**S1 Table. Primers for qRT-PCR.**

| <b>Gene</b>    | <b>Primers</b>                                                          |
|----------------|-------------------------------------------------------------------------|
| <i>Abca1</i>   | Forward: 5'-AGGCCGCACCATTATTTTGTC<br>Reverse: 5'-GGCAATTCTGTCCCCAAGGAT  |
| <i>Acat1</i>   | Forward: 5'-<br>CAGGAAGTAAGATGCCTGGAAC                                  |
| <i>Apoa2</i>   | Forward: 5'-CTGACCTGACAAGGGGTGTC<br>Reverse: 5'-ATGGCAAAGATTTGGTGGAG    |
| <i>Apod</i>    | Forward: 5'-TGAAGCCAAACAGAGCAACGT<br>Reverse: 5'-GGCATCAACGGGAAGAACTG   |
| <i>Apoe</i>    | Forward: 5'-GGCCCAGGAGAATCAATGAG<br>Reverse: 5'-CCTGGCTGGATATGGATGTTG   |
| <i>Cyp46a1</i> | Forward: 5'-CCTTCTT CATTGCTGGTCACG<br>Reverse: 5'-TCCATCACTGTGAACGCCAAG |
| <i>Cyp51</i>   | Forward: 5'-<br>AGAGCCCATCGAGAGATCAAGA                                  |
| <i>Dhcr24</i>  | Forward: 5'-CATCGTCCCACAAGTATG<br>Reverse: 5'-CTCTACGTCGTCGGTCA         |
| <i>Ebp</i>     | Forward: 5'-TATCGGCTATCTCCCTTGGA<br>Reverse: 5'-ATCGAGGGCTGGTTCTCTCT    |
| <i>Fdps</i>    | Forward: 5'-ATACCAGCAGATCTGTCCCC<br>Reverse: 5'-TGGGCTGGTGTGTAGAACTG    |
| <i>Gp78</i>    | Forward: 5'-<br>ACAAAGACCTATCTGAAACGTCC                                 |
| <i>Hmgcr</i>   | Forward: 5'-TTGGTCCTTGTTACGCTCAT<br>Reverse: 5'-TTCGTCCAGACCCAAGGAAAC   |
| <i>Hmgcs2</i>  | Forward: 5'-TCATTGAACATCAACCGAGC<br>Reverse: 5'-GAAACAACCAGCCTTTCACC    |
| <i>Hsd17b7</i> | Forward: 5'-<br>TGCTGGAATCCTGCCTAATCCACA                                |
| <i>Idol</i>    | Forward: 5'-GGAGCATGTCCAGCACGTCTA<br>Reverse: 5'-GTGCAGGACGCATCAGATGA   |
| <i>Ldlr</i>    | Forward: 5'-ACCTGCCGACCTGATGAATTC<br>Reverse: 5'-GCAGTCATGTTACGGTCACA   |
| <i>Lipe</i>    | Forward: 5'-CCTGTCTCGTTGCGTTTGTA<br>Reverse: 5'-ACGCTACACAAAGGCTGCTT    |
| <i>Lxra</i>    | Forward: 5'-AGCGTCCATTCAGAGCAAGTG<br>Reverse: 5'-CACTCGTGGACATCCCAGATCT |
| <i>Lxrβ</i>    | Forward: 5'-ACTCGGAGCAGGTCTTTGCAT<br>Reverse: 5'-CCTACTCGTGCACATCCCAGAT |

|               |                                                                         |
|---------------|-------------------------------------------------------------------------|
| <i>Nsdhl</i>  | Forward: 5'-TCGAAGCAAATATGGTCCC<br>Reverse: 5'-TGGAGTTCAGTGGGTGCAG      |
| <i>Prkaa1</i> | Forward: 5'-GTCAAAGCCGACCCAATGATA<br>Reverse: 5'-                       |
| <i>Prkag2</i> | Forward: 5'-GGTGTTGACGGAGAAGAGGA<br>Reverse: 5'-TCATCCAAAGAGTCTTCGCC    |
| <i>Sc5d</i>   | Forward: 5'-TGGCCCGAGGACAACA<br>Reverse: 5'-GCACCCAGGTTTGTGACAA         |
| <i>Scap</i>   | Forward: 5'-CGTGGCGTACATCCAACAGA<br>Reverse: 5'-GTTGGAATGCTCGGGACAGA    |
| <i>Snx17</i>  | Forward: 5'-CAGGGGTCAAAGAGAACAGC<br>Reverse: 5'-GTGAATGGAGTCCTGCACTG    |
| <i>Sreb1a</i> | Forward: 5'-ATGGACGAGCCACCCTTCA<br>Reverse: 5'-                         |
| <i>Sreb2</i>  | Forward: 5'-ATGATCACCCCGACGTTTCAG<br>Reverse: 5'-GGTCGCTGCGTTCTGGTATATC |
| <i>Ubc-7</i>  | Forward: 5'-<br>CTGGCAGAACTCAACAAAAATCC                                 |
