# Supplementary material for: Transcriptional and post-translational changes in the brain of mice deficient in cholesterol removal mediated by cytochrome P450 46A1 (CYP46A1)
Source: PubMed Central journal article supplement (PMC5658173; doi:10.1371/journal.pone.0187168), 2017-10-26
Supplement: pone.0187168.s003.pdf [file pone.0187168.s003.pdf]

**S2 Table. Alphabetical list of proteins and phosphopeptides with differential abundance in the *Cyp46a1*<sup>-/-</sup> brain as compared to the wild type brain.** Proteins with several identified phosphopeptides are shown first followed by the proteins with only one identified phosphopeptide. WT, wild type mice; KO, *Cyp46a1*<sup>-/-</sup> mice; Mo, oxidized methionine. The KO/WT peptide ratios higher than 1 are in bold.

| #  | Protein          | Sequence                          | Site of phosphorylation | Peptide ratio, KO/WT |
|----|------------------|-----------------------------------|-------------------------|----------------------|
| 1  | ADCY9            | AIEKDSCEDIGVEEASELSK              | S6                      | 0.46                 |
|    |                  | GQGTASPGSVSDLAQTVK                | S6; S9                  | 0.21                 |
| 2  | ADD1             | EKSPPDQSAVPNTPPSTPVKLEEDLPQEPTSR  | S3; S8; S16             | 0.53                 |
|    |                  | YSDVEVPASVTGHSFASDGDGSGTCSPLR     | S25                     | 0.18                 |
|    |                  | TPSFLKK                           | S3                      | 0.04                 |
| 3  | ANK2             | KGSSEESVDEDRGLVPEPLPTAK           | S3; S4; S7              | 0.65                 |
|    |                  | TAEGTEPKPQGAIRSPQGLELPLPNR        | S15                     | 0.30                 |
|    |                  | TEGDSPAALSPQMHQEPVQQDFSGK         | S5; S11                 | 0.10                 |
| 4  | ATP2B2           | SATSSSPGSPHLSLETSL                | S17                     | 0.41                 |
|    |                  | SATSSSPGSPLHSLETSL                | S5; S6; S9              | 0.38                 |
| 5  | EPB4.1L1         | ADSSDETDTSAER                     | S3; S4                  | 0.62                 |
|    |                  | DLGFVQLQPPGDLASPK                 | S15                     | 0.18                 |
|    |                  | GPSSQEDESGLLEDSPDRGACSTPEMPQFESVK | S15                     | 0.14                 |
| 6  | HCN2             | DSASPGAASGLDPLDSAR                | S4                      | 0.41                 |
|    |                  | RAPPGLPPAASPGPPAASPPAAPSSPR       | S12; S19; S25           | 0.14                 |
| 7  | HDGF             | AGDVLEDSPK                        | S8                      | 0.34                 |
|    |                  | AGDVLEDSPKRPK                     | S8                      | 0.13                 |
| 8  | IMPACT           | KTEEVEVESEEDPILEHPPENPVK          | S9                      | 0.43                 |
|    |                  | TEEVEVESEEDPILEHPPENPVK           | S8                      | 0.26                 |
| 9  | LOC102641<br>872 | QESGSSLEPPSGLALEDGAHVLR           | S3                      | 0.35                 |
|    |                  | RQESGSSLEPPSGLALEDGAHVLR          | S4                      | 0.04                 |
| 10 | MAP1A            | AELEEMoEEVHPSDEEEEEETKAESFYQK     | S12                     | <b>3.04</b>          |
|    |                  | SPPCEDFSVTGESEK                   | S1                      | <b>2.42</b>          |
|    |                  | EAELTPENIAAAR                     | T5                      | <b>2.20</b>          |
|    |                  | ALGLEESPEEEGK                     | S7                      | <b>1.88</b>          |
|    |                  | EMTLDQKSPEK                       | S8                      | 0.22                 |
|    |                  | SLLLLDTVTSIPSSR                   | S10; S13; S14           | 0.11                 |
| 11 | MAP1B            | VLSPLRSPLLGSESPYEDFLSADSK         | S7                      | <b>in KO only</b>    |
|    |                  | DYNASASTISPPSSMoEEDK              | S10                     | <b>10.04</b>         |
|    |                  | GEAEQSEEEGEEEDKAEDAR              | S6                      | <b>2.68</b>          |
|    |                  | DYNASASTISPPSSMoEEDKFSK           | T8                      | <b>2.61</b>          |
|    |                  | FEDEGAGFEESSETGDYEEK              | S12                     | <b>2.60</b>          |
|    |                  | RESVVSGDDRAEEDMoDDVLEK            | S3; S6                  | <b>2.13</b>          |
|    |                  | TPEEGGYSYEISEK                    | T1                      | <b>1.65</b>          |

|    |                  |                                         |               |             |
|----|------------------|-----------------------------------------|---------------|-------------|
|    |                  | VQSLEGEKLSPKSDISPLTPR                   | S10; S13; S16 | 0.62        |
|    |                  | DVSDERLSPAKSPSLSPSPPIEK                 | S8; S12; S14  | 0.33        |
|    |                  | DYNASASTISPPSSMEEDKFSK                  | S10; S13      | 0.17        |
| 12 | MAP2             | GLSSVPEVAEVEPTTK                        | S4            | 0.36        |
|    |                  | DKVTDGISKSPEKR                          | S10           | 0.14        |
| 13 | MAPT             | TTPSPKTPPGSGEPPK                        | S4; S11       | 0.76        |
|    |                  | AKTDHGAEIVYKSPVVSVDTSR                  | S13; S17; S21 | 0.59        |
|    |                  | STPTAEDVTAPLVDER                        | S1            | 0.52        |
|    |                  | SPVVSGDTSR                              | S5; S9        | 0.41        |
|    |                  | SPVVSGDTSR                              | S9            | 0.20        |
| 14 | MARCKS           | GEATAERPGEAAVASSPSK                     | S16           | <b>1.71</b> |
|    |                  | VNGDASPAAAEPGAK                         | S6            | 0.30        |
| 15 | NEFH             | AKSPVKEDIKPPAEAKSPEK                    | S3; S17       | <b>1.70</b> |
|    |                  | SPAEAKSPIEVKSPEK                        | S1; S7; S13   | <b>1.47</b> |
|    |                  | SPAEAKSPIEVK                            | S1; S7        | <b>1.22</b> |
| 16 | NEFM             | EEAEEKEEPEAEKSPVKSPEAK                  | S15; S19      | <b>2.08</b> |
|    |                  | VSGSPSSGFR                              | S4            | 0.26        |
| 17 | OXR1             | RDSETEVEELR                             | S3            | <b>1.37</b> |
|    |                  | VVSSTSEEEAFTEK                          | S4; S6        | 0.46        |
| 18 | SMAP2            | AVGSMPTAGSAGSVPENLNFPEPGSK              | S13           | 0.33        |
|    |                  | KAVGSMPTAGSAGSVPENLNFPEPGSK             | T8            | 0.06        |
| 19 | UBR4             | HVTLPSSPR                               | S7            | 0.55        |
|    |                  | TLSDVEDQKELASPVPELR                     | S13; S16      | 0.11        |
| 20 | 231002B0<br>5RIK | SSSLDALGPAR                             | S3            | 0.60        |
|    |                  | QSGTPPGM <sub>0</sub> GAPGIPGASIVGGAGGR | T4            | 0.48        |
| 21 | ADD2             | STPASPVQSPSK                            | S5; S9        | 0.38        |
| 22 | AMPH             | AFSIQGAPSDSGPLR                         | S11           | 0.31        |
| 23 | ANKRD13<br>D     | GPESPQKTPSPAPPSFEEQLR                   | S4; S11       | 0.21        |
| 24 | ANO8             | RPGPSPDGLLEEGSPTMVEK                    | S14           | 0.27        |
| 25 | AP1M2            | KQSVANGVEISVPVPSDADSPRFKTSVGS AK        | S11; S16      | 0.64        |
| 26 | AP3B2            | AFYGSEEDEAK                             | S5            | <b>1.29</b> |
| 27 | ASAP1            | QASEDSNDLTPTLPETPVPLPR                  | S3            | 0.68        |
| 28 | ATP1A2           | VAEIPFNSTNK                             | T9            | <b>2.68</b> |
| 29 | ATP2B3           | SGSFQGA VR                              | S3            | 0.10        |
| 30 | BNIP3L           | DHSSQSEEEVVEGEKEVEALKK                  | S3; S4; S6    | 0.39        |
| 31 | BOD1L            | AVHEFLATLNHK                            | T8            | 0.15        |
| 32 | BRAF             | SSSAPNVHINTIEPVNIDEK                    | S3            | 0.68        |
| 33 | BSN              | SKTPPSNLSPIEDASPTTELR                   | S9; S15       | 0.14        |
| 34 | C2CD2L           | SDISERPSVDDVESETGSTGALETR               | S8; S14       | 0.11        |
| 35 | CACNA1E          | EVSPMSAPNMPSIER                         | S3            | 0.18        |
| 36 | CAND1            | DSSSTNLESMDTS                           | S2            | 0.21        |

|    |                   |                               |               |              |
|----|-------------------|-------------------------------|---------------|--------------|
| 37 | CCDC88A           | DGVHFLPHASSSAQSPCGSPGMK       | S15           | 0.39         |
| 38 | CEP170B           | SPSLGNVPNTPASTISAR            | S3            | <b>1.83</b>  |
| 39 | CHGB              | EGVDDQESLRPSNQQASK            | S17           | <b>1.86</b>  |
| 40 | CIT               | SPEHQPSAMSLAPSSR              | S10           | 0.61         |
| 41 | CLDN11            | FYYSSGSSSPTHAK                | S8; S9        | <b>1.17</b>  |
| 42 | CNNM1             | GTPQTPKDDPVLTLSSNR            | T2; T5        | 0.64         |
| 43 | CSTF2             | GQGTLQHSPVGPAGPASIER          | S8            | 0.67         |
| 44 | CTNNA1            | TSVQTEDDQLIAGQSAR             | S2            | <b>1.73</b>  |
| 45 | CTNNB1            | TSMoGGTQQQFVEGVR              | T1            | <b>1.42</b>  |
| 46 | CTNND2            | NSSLSPGLNTSNGDGSETETTSAILASVK | S5            | 0.53         |
| 47 | D430041D0<br>5RIK | NVTASDEEEGAGLFDSAGK           | S5            | 0.39         |
| 48 | DBN1              | LSSPVLHR                      | S3            | 0.03         |
| 49 | DMTN              | QPLTSPGSVSSSR                 | S5            | 0.65         |
| 50 | DMXL2             | SSDDIDYR                      | S2            | 0.45         |
| 51 | DNAJC6            | TATSASASPTLR                  | S8            | 0.33         |
| 52 | DOPEY2            | AALLAAFQPESPR                 | S11           | 0.08         |
| 53 | DPYSL2            | GLYDGPVCEVSVTPKTVTPASSAK      | T13; T16; T18 | 0.48         |
| 54 | DST               | SGSASPAPGDPLPWNLPK            | S3; S5        | 0.51         |
| 55 | DYNC111           | ADSEEEGAVELAA                 | S3            | 0.37         |
| 56 | EIF4B             | YAALSVDGEDEDEGDCTE            | T18           | 0.24         |
| 57 | EIF4G2            | TQTPPLGQTPQLGLK               | T3            | 0.16         |
| 58 | FAM63A            | VETAEVCSRQELPQSPR             | S16           | 0.72         |
| 59 | GAP43             | EGDGSATTDAAPATSPK             | S15           | 0.38         |
| 60 | GPN1              | GNASPVLDPSDLILTR              | S4            | 0.51         |
| 61 | GPR158            | VSLPTANPDVSSGITQIK            | S2            | 0.64         |
| 62 | HCN1              | LGTPPGGAAGK                   | T3            | 0.38         |
| 63 | HMGA1-<br>RS1     | EEEEGISQESSEEEQ               | S10; S11      | <b>7.85</b>  |
| 64 | HN1               | SNSSEASSGDFLDLK               | S3            | 0.81         |
| 65 | HSP90AB1          | IEDVGSDEEDDSGKDKK             | S6            | 0.29         |
| 66 | HSPH1             | IESPKLER                      | S3            | 0.04         |
| 67 | HUWE1             | AESPEEVACR                    | S3            | 0.57         |
| 68 | IGF2R             | AEALSSLHGDDQDSEDEVLTVPVK      | S14           | 0.55         |
| 69 | KBTBD11           | ASAAEGSEASPPSLR               | S10; S13      | 0.34         |
| 70 | KCNA2             | IPSSPDLKK                     | S4            | 0.31         |
| 71 | KCNMA1            | RLEDEQPPTLSPK                 | T9; S11       | 0.06         |
| 72 | KCNQ2             | QNSEEASLPGEDIVEDNK            | S3            | 0.55         |
| 73 | KCTD12            | SPSGGAAGPLLTPSQSLDGSR         | S1            | 0.29         |
| 74 | KIF1A             | TPQPCSRPASPEPELLPELDSK        | S6; S10       | 0.49         |
| 75 | KPNA3             | NVPQEESSLESDVDADFK            | S7            | 0.40         |
| 76 | LMBRD1            | SVIEGVDESDLSDDPEPSAYSA        | S10; S13      | <b>11.30</b> |

|     |          |                                 |              |             |
|-----|----------|---------------------------------|--------------|-------------|
| 77  | LMO7     | EVIATEDVASLSSPTLPSSSLSHDR       | S13          | 0.11        |
| 78  | LMTK2    | NAGFTSALLESPQR                  | S11          | 0.31        |
| 79  | LSM12    | TETPPPLASLNVSK                  | T3           | 0.30        |
| 80  | MACF1    | AFLAELEQNSPK                    | S10          | 0.33        |
| 81  | MADD     | SPTENVNTPVGK                    | S1           | <b>1.41</b> |
| 82  | MAP6     | AQSPLLPEPLK                     | S3           | 0.45        |
| 83  | MARK1    | SRPSSDLNNSLQSPAHLK              | S1; S4       | 0.59        |
| 84  | MIOS     | GFSQYGVSGSPTK                   | S10          | 0.77        |
| 85  | MOBP     | HQPAASPVVVR                     | S6           | 0.16        |
| 86  | MPRIP    | AEEQLPPLSPPSPSTPHSR             | S13          | 0.30        |
| 87  | MYO5A    | AISPTSATSSGR                    | S3           | 0.29        |
| 88  | NCAM1    | NPPEAATAPASPK                   | S11          | 0.24        |
| 89  | NCAM2    | DGSKEPIVEMoR                    | S3           | 0.22        |
| 90  | NCOA5    | LLRSSADSLPGELR                  | S5; S8       | 0.23        |
| 91  | NDEL1    | SAPSSPTLDCEK                    | S1; S4       | 0.54        |
| 92  | NRBP2    | EREDESEDESILEESPCGR             | S10          | <b>1.61</b> |
| 93  | OBSCN    | AGLASFR                         | S5           | 0.27        |
| 94  | PAK1     | DVATSPISPTEENNTTPPDALTR         | S8           | 0.22        |
| 95  | PCDH17   | ALSPLLQEVPSASSSPTK              | T17          | 0.54        |
| 96  | PKP4     | SAVSPDLHITPIYEGR                | S4           | 0.34        |
| 97  | PLCL1    | KLPSESDLLEGEVTDEDEEAEMoSR       | T14          | 0.39        |
| 98  | PLEC     | NDESQLSPATR                     | S7           | 0.40        |
| 99  | PPME1    | QCEGITSPEGSK                    | T6           | 0.22        |
| 100 | PRKCG    | SPTSPVPVPM                      | S1; S4       | 0.32        |
| 101 | PRRT3    | RGSQPDAELDGAGTSLLR              | S3           | 0.69        |
| 102 | PSIP1    | NLAKPGVTSTSDSEDEDDQEGEK         | S9; S11; S13 | <b>6.81</b> |
| 103 | PSIP2    | QSNASSDVEVEEK                   | S6           | 0.51        |
| 104 | PSMA3    | ESLKEEDESDDDNMo                 | S9           | 0.54        |
| 105 | PSMD9    | LASNSPVLQAFAR                   | S5           | 0.6         |
| 106 | PTK2B    | NSLPQIPTLNLEAR                  | S2           | 0.57        |
| 107 | PTPRN2   | SEQPEEVLSSSEETAGVEHVR           | S9; S10      | 0.39        |
| 108 | PURB     | RGGGSGGGDESEGEVDED              | S11          | 0.42        |
| 109 | RAB3IP   | TLVLSSSPTSPTQEPLAAAK            | T9           | 0.42        |
| 110 | RALBP1   | TEGYAAFQEDSSGDEAESPSK           | S11; S12     | <b>1.67</b> |
| 111 | RAP1GAP2 | SETSSNPSSPEICPNK                | S5; S8; S9   | 0.190       |
| 112 | RBM25    | LGASNSPGQPNSVK                  | S6           | 0.39        |
| 113 | RCSD1    | AIVSPFHSPSTPSSPGIR              | S8           | 0.09        |
| 114 | RGS8     | SDSCSDFTAILPDKPNR               | S3           | 0.24        |
| 115 | RRAS2    | FQEQECPPSPEPTR                  | S9           | <b>1.31</b> |
| 116 | RTN1     | SPPVAMoETASTGMoAAVPDALDHSPSSTLK | S23          | 0.11        |
| 117 | SAMD14   | SLDEDEPPPSPLAR                  | S1           | 0.45        |

|     |          |                                                      |          |             |
|-----|----------|------------------------------------------------------|----------|-------------|
| 118 | SCG2     | EHLGPGSSQEMER                                        | S7       | 0.31        |
| 119 | SEPT8    | SDIAAAQQSGMSLSNSK                                    | S16      | 0.20        |
| 120 | SERINC1  | LTLTSDESTLIEDGNR                                     | S5       | 0.33        |
| 121 | SGIP1    | DDYLETLSSPK                                          | S9       | 0.31        |
| 122 | SHANK2   | QSNVEDSPEKTCSEIPIIIVK                                | T11      | In WT only  |
| 123 | SHANK3   | SLGEEPVGGLGSLDDPAK                                   | S1       | 0.52        |
| 124 | SIK3     | GPSPLVTM <sub>0</sub> TPAVPAVTPVDEESSDGEPDQEAV<br>QR | S22; S23 | <b>5.03</b> |
| 125 | SLC1A3   | DVEMGNSVIEENEMK                                      | S7       | 0.37        |
| 126 | SLC23A2  | SSLAETLDSTGSLDPQR                                    | S12      | 0.43        |
| 127 | SLC24A2  | SPTAGDKDGPTLPVGSSSAACSTSEECVAESK<br>PR               | S1       | 0.57        |
| 128 | SLC43A2  | LCLSTVDLEVK                                          | S4       | 0.27        |
| 129 | SLC8A2   | GISALLLNQGNQDKK                                      | S3       | 0.31        |
| 130 | SNAP91   | KPGNNEGSGAPSPSK                                      | S8; S12  | 0.64        |
| 131 | STK32C   | GSSAAAPPSSPPPGR                                      | S10      | 0.38        |
| 132 | STMN3    | SPSDLSPESVLSSPPK                                     | S9; S13  | 0.18        |
| 133 | STRN4    | ASPGPGGLSGGESLLVK                                    | S2       | 0.37        |
| 134 | STXBP1   | LNKTDEEISS                                           | S10      | 0.20        |
| 135 | SYAP1    | DDNLPLTEAVRPKTPPVVIK                                 | T14      | 0.29        |
| 136 | SYN1     | LPSPTAAPQQSASQATPVTQGQGR                             | S3       | 0.74        |
| 137 | SYT1     | DDDAETGLTDGEEKEEPKEEEK                               | T9       | <b>1.44</b> |
| 138 | THRAP3   | IDISPSTFR                                            | S4       | 0.61        |
| 139 | THUMPD1  | FIDKDQQPSGSEGEDDDAEAAALK                             | S9; S11  | <b>1.25</b> |
| 140 | TMCC1    | ALGVISNFQSSPK                                        | S11      | 0.76        |
| 141 | TNKS1BP1 | SSGSLSPGLETEDPLEAR                                   | S6       | 0.82        |
| 142 | TOP2B    | IVETINSDSDSEFGIPK                                    | S9       | 0.55        |
| 143 | TTC7B    | VEQALSEVASSLQSSAPK                                   | S10; S11 | 0.67        |
| 144 | UBXN6    | GKSPQLALR                                            | S3       | 0.01        |
| 145 | USP20    | AVPIAVADEGESESEDDDLKPR                               | S12; S14 | 0.28        |
| 146 | VDAC2    | LTFDITTFSPNTGK                                       | S8       | 0.29        |
